# Supplementary material for: Egg white-derived carbon/magnetic nanoparticles/water-soluble graphene oxide composite with homogeneous structure as an excellent electromagnetic wave absorber
Source: Royal Society of Chemistry journal article supplement (doi:10.1039/d1tc01794b), 2021-01-01
Supplement: d1tc01794b1.pdf [file d1tc01794b1.pdf]

## **Supplementary information**

### **Egg whites-derived carbon/magnetic nanoparticles/water-soluble graphene oxide composite with homogeneous structure as an excellent electromagnetic wave absorber**

Author: Pan Xu, Hongru He, Desheng Qi, Linyu Fu, Xigui Yue, and Xuanbo Zhu\*

Corresponding Xuanbo Zhu

E-mail addresses: zhuxuanbo@jlu.edu.cn

Tel: +86 431 85168868

Key Laboratory of High Performance Plastics (Jilin University), Ministry of Education.  
National & Local Joint Engineering Laboratory for Synthesis Technology of High Performance Polymer. College of Chemistry, Jilin University, Changchun, 130012, P. R. China.

### SI-1: The synthesis of $\text{Co}_{0.2}\text{Fe}_{2.8}\text{O}_4$ nanoparticles

$\text{H}_2\text{O}$  (300 ml),  $\text{FeCl}_3 \cdot 6\text{H}_2\text{O}$  (1.9867 g, 7.35 mmol),  $\text{FeCl}_2 \cdot 4\text{H}_2\text{O}$  (0.5845 g, 2.94 mmol),  $\text{CoCl}_2 \cdot 6\text{H}_2\text{O}$  (0.1749 g, 0.74 mmol) were added to a 500 mL three-necked flask. With the protection of Ar, the solution was rapidly heated to 70 °C with a mechanical stirring (1000 rpm). Subsequently,  $\text{NH}_3 \cdot \text{H}_2\text{O}$  (13.5 mmol) was added to the mixed solution to adjust the pH to 10. And then it reacts at 70 °C for an hour, the products were collected by magnet and washed several times with deionized water and ethanol to remove impurities. The product is dried by a freeze dryer and stored in a cool place under vacuum and sealed conditions. Subsequently, the morphology of  $\text{Co}_{0.2}\text{Fe}_{2.8}\text{O}_4$  nanoparticles was investigated by TEM as shown in **Fig S1**. Through observation, the  $\text{Co}_{0.2}\text{Fe}_{2.8}\text{O}_4$  nanoparticles is spherical and have an average diameter about of 50 nm.

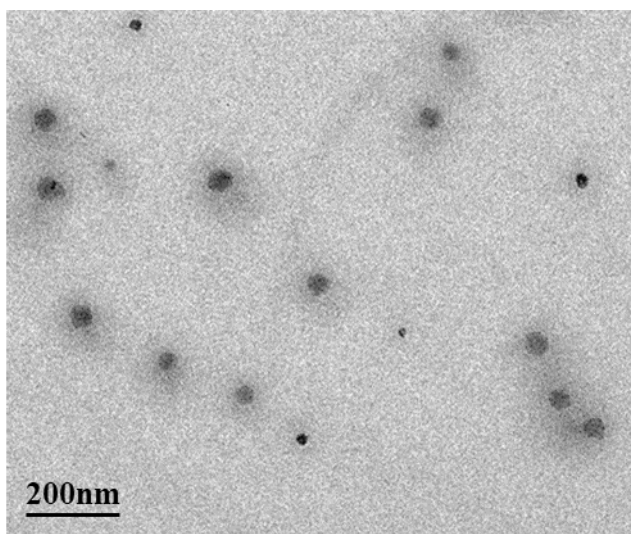

**Fig. S1.** The TEM image of the synthesized  $\text{Co}_{0.2}\text{Fe}_{2.8}\text{O}_4$ .

## SI-2: Preparation of coaxial rings of paraffin matrix materials

First, A certain amount of EWC/MNPs/WSGO was put into a mortar, ground into powder, and bagged for storage. Then weigh 0.1 g EWC/MNPs/WSGO and 0.1 g paraffin, add them into the mortar and grind them vigorously to make them evenly mixed. Then the mixture was poured into a standard mold and compacted with a bench vice to obtain a coaxial ring with an outer diameter of 7.0 mm, an inner diameter of 3.04 mm, and a thickness of 2.0 mm.

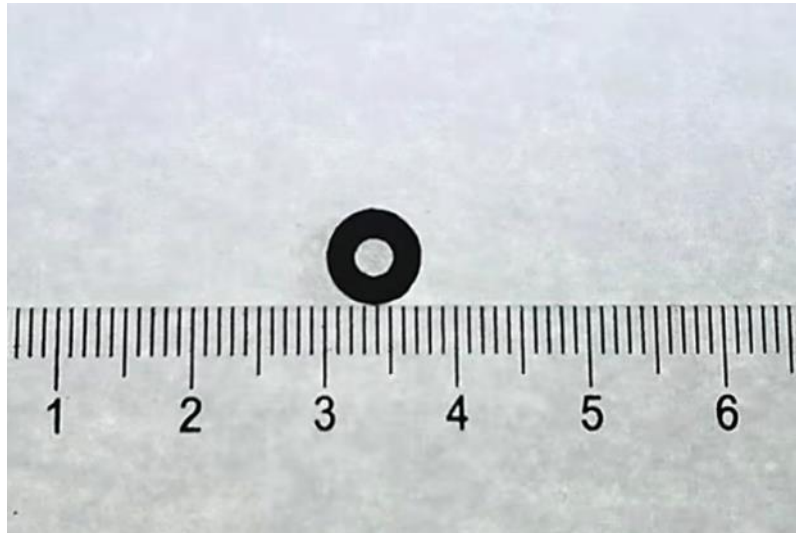

**Fig. S2.** The coaxial ring of materials with paraffin matrix for measurement of electromagnetic parameters and EMW absorption performances.

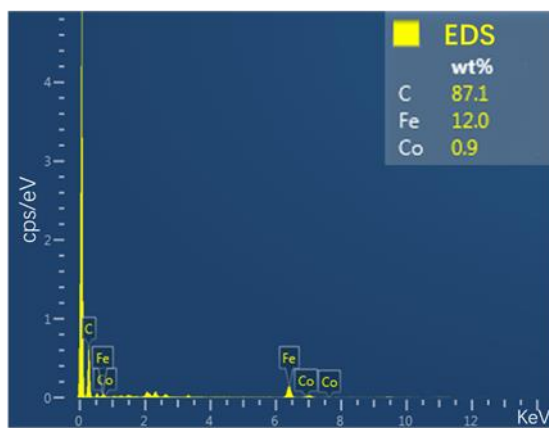

**Fig. S3.** The EDS elemental data for EWC/MNPs/WSGO-1.0.

### SI-3: Thermogravimetric Analysis (TGA)

TGA was performed to further explore the content of metal nanoparticles in the composite absorbers, in air atmosphere, when the temperature rises to 450 °C, the sample mass increases. This is because Fe and Co react with oxygen to form metal oxides under high-temperature conditions, increasing sample's mass. When the temperature is higher than 450 °C, the carbon components in the sample begin to decompose. When the temperature is up to 750 °C, the carbon components are completely decomposed, and the remaining components are only metal oxides. According to equation 1, the weight percentages of metal for EWC/MNPs/WSGO-0.0, EWC/MNPs/WSGO-0.5, EWC/MNPs/WSGO-1.0, EWC/MNPs/WSGO-2.0, EWC/MNPs/WSGO-4.0 were calculated as 15.90, 14.49, 12.18, 11.16 and 9.86 wt%, respectively.

$$C_{(wt\%)} = \left(\frac{m_r}{m_i}\right) * 2 * A_M / M_{M_3O_4} \quad (1)$$

where  $C_{(wt\%)}$  is the content of metal,  $m_r$  is the remaining weight,  $m_i$  is the initial weight of the sample,  $A_M$  is the atomic weight of the metal, and  $M_{M_3O_4}$  is the molecular weight of  $M_3O_4$ . In the case of EWC/MNPs/WSGO-0.0, EWC/MNPs/WSGO-0.5, EWC/MNPs/WSGO-1.0, EWC/MNPs/WSGO-2.0, EWC/MNPs/WSGO-4.0, the average atomic weight of the Fe/Co alloy and the average molecular weight of the corresponding oxides are calculated based on the initial Fe/Co molar ratios of the preparation process for EWC/MNPs/WSGO and used in equation 1.

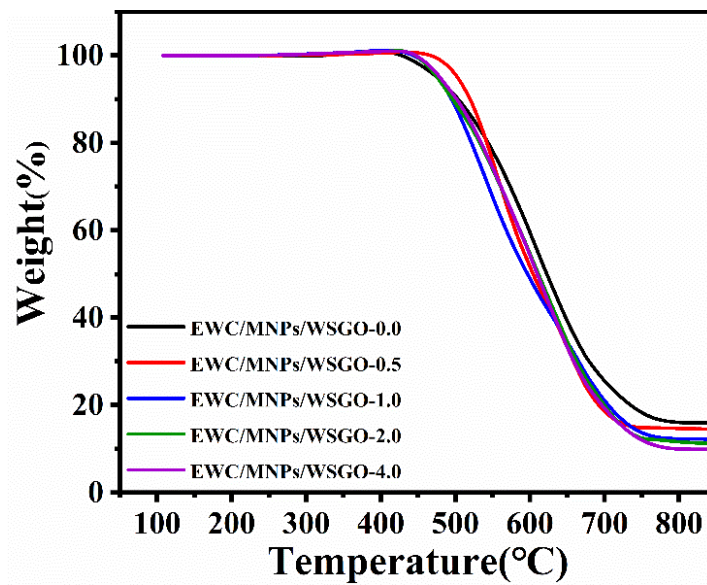

**Fig. S4.** TGA curves of EWC/MNPs/WSGO-0.0, EWC/MNPs/WSGO-0.5, EWC/MNPs/WSGO-1.0, EWC/MNPs/WSGO-2.0, and EWC/MNPs/WSGO-4.0 composites in air.

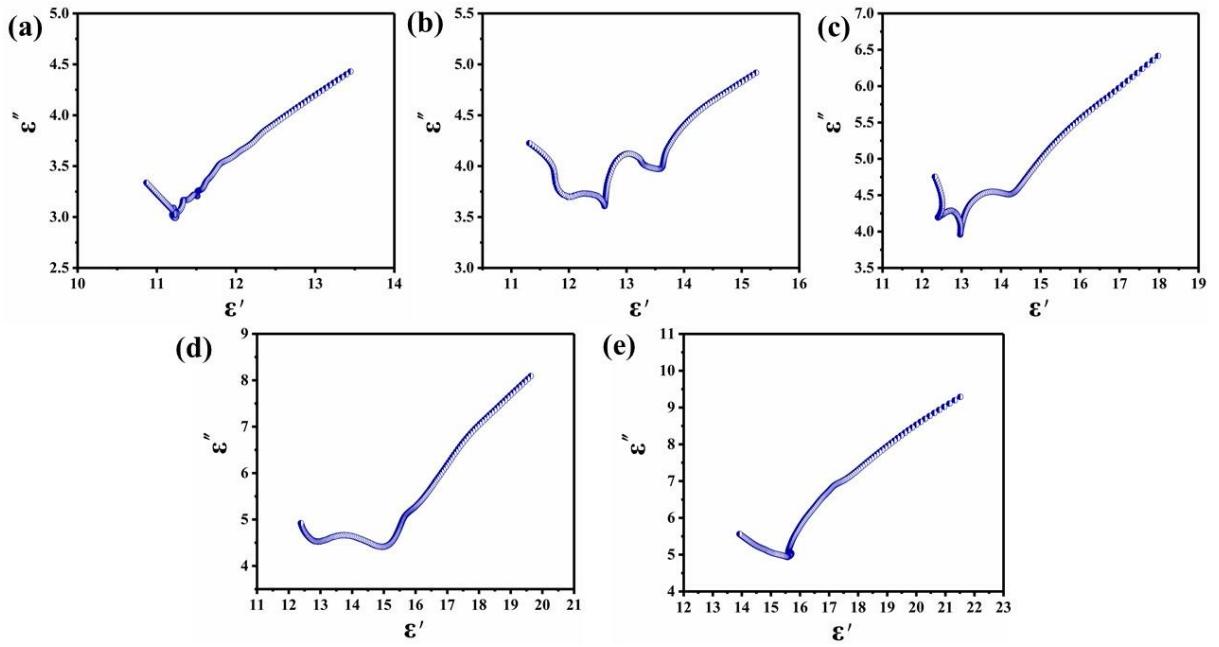

**Fig. S5.** Cole–Cole plot of EWC/MNPs/WSGO-0.0 (a), EWC/MNPs/WSGO-0.5 (b), EWC/MNPs/WSGO-1.0 (c), EWC/MNPs/WSGO-2.0 (d), and EWC/MNPs/WSGO-4.0 (e).

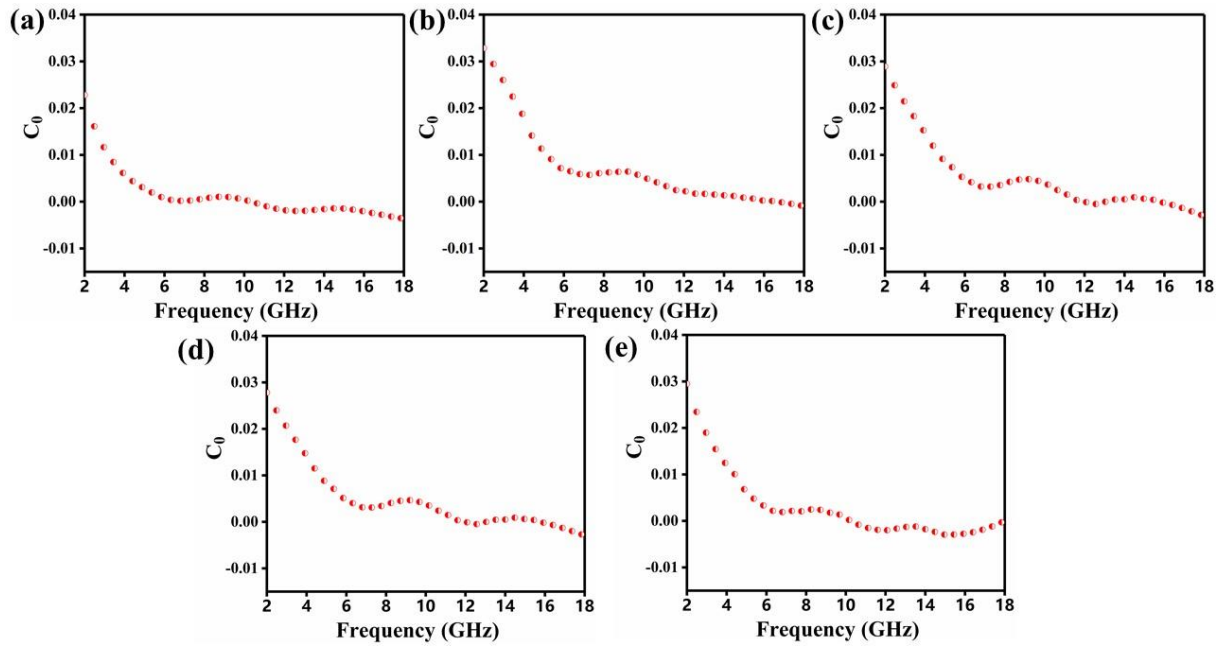

**Fig. S6.** the value of the eddy current ( $C_0, \mu''(\mu')^{-2}f^1$ ) of EWC/MNPs/WSGO-0.0 (a), EWC/MNPs/WSGO-0.5 (b), EWC/MNPs/WSGO-1.0 (c), EWC/MNPs/WSGO-2.0 (d), and EWC/MNPs/WSGO-4.0 (e).



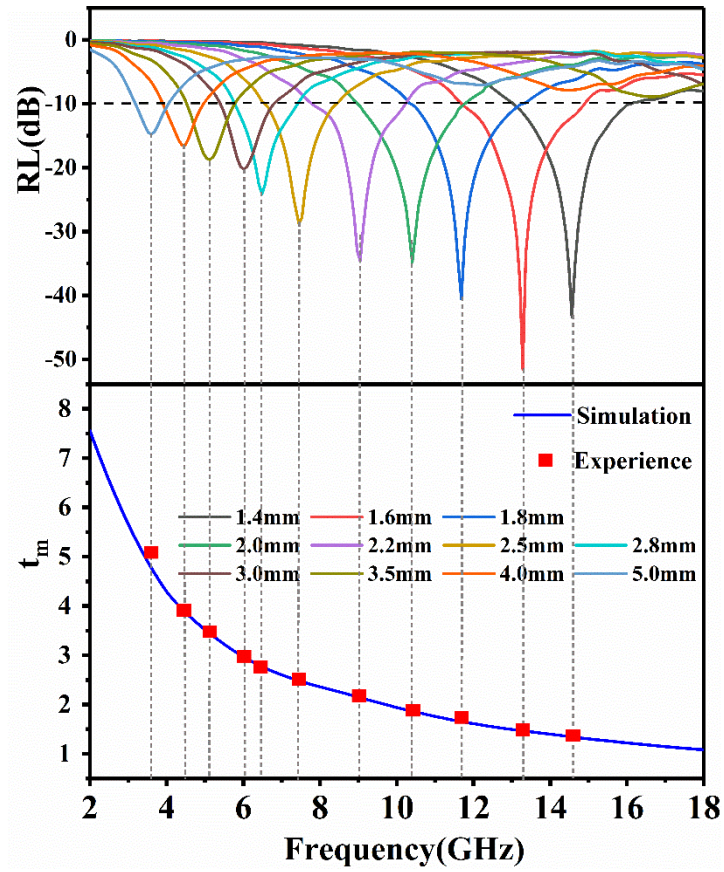

**Fig. S7.** (a) The RL-Frequency curves of EWC/MNPs/WSGO-1.0 in 2–18 GHz with the absorber content of 50 wt% ; (b) Relationship between simulation thickness and peak frequency of EWC/MNPs/WSGO-1.0.
